# Functional Consequences of Cell Type-Restricted Expression of Laminin $\alpha 5$ in Mouse Placental Labyrinth and Kidney Glomerular Capillaries

Sung Tae Kim<sup>1</sup>, Tracy L. Adair-Kirk<sup>2</sup>, Robert M. Senior<sup>2,3</sup>, Jeffrey H. Miner<sup>1,3\*</sup>

**1** Renal Division, Washington University School of Medicine, St. Louis, Missouri, United States of America, **2** Division of Pulmonary and Critical Care Medicine, Washington University School of Medicine, St. Louis, Missouri, United States of America, **3** Department of Cell Biology and Physiology, Washington University School of Medicine, St. Louis, Missouri, United States of America

## Abstract

The labyrinth is the highly vascularized part of the rodent placenta that allows efficient transfer of gases, nutrients, wastes, and other molecules between the maternal and embryonic circulations. These two blood compartments are separated by blastocyst-derived trophoblasts and endothelial cells with an intervening basement membrane that contains laminin and other typical basement membrane components. Previously we reported that the labyrinth of laminin  $\alpha 5$  knockout (*LM $\alpha 5$ -/-*) embryos exhibits reduced vascularization and detachment of endothelial cells from the basement membrane, which normally contains LM $\alpha 5$ . As very little is known about the origin of this vascular basement membrane, we investigated the cellular requirements for LM $\alpha 5$  expression in the mouse placental labyrinth. By fluorescence-activated cell sorting and RT-PCR we confirmed that both endothelial cells and trophoblasts normally express LM $\alpha 5$ . Using Cre-loxP technology and doxycycline-mediated gene expression, we generated genetically mosaic placentas in which either the trophoblasts or the endothelial cells, but not both, expressed LM $\alpha 5$ . We found that the overall architecture of the labyrinth was normal as long as one of these two cell types expressed LM $\alpha 5$ , even if it was transgene-derived human laminin  $\alpha 5$ . These results suggest that laminin trimers containing  $\alpha 5$  that are synthesized and secreted by endothelium or by trophoblasts are capable of integrating into the basement membrane and promoting normal vascularization of the placenta. Additional studies showed that endothelium-expressed human LM $\alpha 5$  can support vascularization of the kidney glomerulus, consistent with previous studies using a tissue grafting approach.

**Citation:** Kim ST, Adair-Kirk TL, Senior RM, Miner JH (2012) Functional Consequences of Cell Type-Restricted Expression of Laminin  $\alpha 5$  in Mouse Placental Labyrinth and Kidney Glomerular Capillaries. PLoS ONE 7(7): e41348. doi:10.1371/journal.pone.0041348

**Editor:** Zhongjun Zhou, The University of Hong Kong, Hong Kong

**Received:** March 29, 2012; **Accepted:** June 20, 2012; **Published:** July 20, 2012

**Copyright:** © 2012 Kim et al. This is an open-access article distributed under the terms of the Creative Commons Attribution License, which permits unrestricted use, distribution, and reproduction in any medium, provided the original author and source are credited.

**Funding:** These studies were supported by grants from the National Institutes of Health (R01GM060432 and R01DK078314 to JHM; P01HL029594 to RMS). Imaging and transgenic mouse studies were supported by the Washington University George M. O'Brien Center for Kidney Disease Research (NIH P30DK079333) and by the Washington University Department of Otolaryngology, Research Center for Auditory and Visual Studies (NIH P30DC004665). The funders had no role in study design, data collection and analysis, decision to publish, or preparation of the manuscript.

**Competing Interests:** The authors have declared that no competing interests exist.

\* E-mail: minerj@wustl.edu

## Introduction

Basement membranes (BMs) are thin sheets of specially organized extracellular matrix proteins associated with many different cell types, including all endothelial and epithelial cells. BMs promote proliferation and survival, provide signals, pathways, and barriers for cell migration, and are responsible for establishing and maintaining compartmentalization within tissues. All BMs contain four major classes of proteins: laminin ( $\alpha\beta\gamma$  heterotrimers), collagen IV ( $\alpha$  chain heterotrimers), nidogen, and heparan sulfate proteoglycan (both monomers).

Because there are numerous protein isoforms within these classes distributed in BMs in distinct cell- and tissue-specific fashions, all BMs are not alike. In many cases, differences in BM composition have been shown to contribute to their functional specificities. For example, the synaptic cleft BM at neuromuscular junctions contains the laminin  $\alpha 2\beta 2\gamma 1$  (LM-221), laminin  $\alpha 4\beta 2\gamma 1$  (LM-421) and laminin  $\alpha 5\beta 2\gamma 1$  (LM-521) heterotrimers, whereas the extrasynaptic BM contains primarily laminin  $\alpha 2\beta 1\gamma 1$  (LM-211) [1]. In knockout mice lacking LM $\beta 2$ , the synaptic laminin

trimers cannot assemble, resulting in severe defects in differentiation, structure, and function of the neuromuscular synapse, despite substitution by other laminin trimers [1,2].

Each of the five mammalian laminin  $\alpha$  chains contains a large COOH-terminal laminin globular (LG) domain that harbors binding sites for cell surface receptors, such as integrins and dystroglycan [3]. Different affinities for different receptors likely contributes a significant degree of specificity to laminin trimers and thus to BM function. The LM $\alpha 5$  chain is widely expressed in mouse tissues [4]. Mutation of *Lama5* (*LM $\alpha 5$* ) in mice causes a diverse array of complex developmental defects and perinatal lethality [5–13]. One of the best-characterized defects is in the formation of kidney glomeruli, highly vascularized structures required for filtration of the blood. In the absence of LM $\alpha 5$ , which is expressed by both glomerular visceral epithelial cells (podocytes) and endothelial cells [14], the glomerular basement membrane (GBM) between them breaks down, and vascularization fails [6]. Another striking defect observed in the absence of LM $\alpha 5$  is in the labyrinth of the placenta. The placental labyrinth is the highly vascularized part of the placenta where the bidirectional transfer

of gases, nutrients, wastes, and other molecules between the maternal and embryonic circulations occurs [15]. In the hemochorial mouse placenta, the barrier between the maternal blood and the embryonic vasculature is formed by three layers of embryo-derived trophoblasts, an endothelial BM, and an embryo-derived endothelium (Fig. 1) [16]. The labyrinth is grossly undervascularized in *LM $\alpha 5$*  null mutants, and the vessels that do form are larger caliber compared to control. In addition, fetal placental endothelial cells lose adhesion to the BM, which normally contains *LM $\alpha 5$* . Together with the fact that *LM $\alpha 5$* <sup>-/-</sup> embryos are smaller than controls after E14.5, we previously suggested that the abnormalities in the labyrinth lead to placental insufficiency [5]. *LM $\alpha 5$*  is also a component of BMs in human placenta [17], where it likely plays a similarly important role in placentation, although no defects in human *LM $\alpha 5$*  (h*LM $\alpha 5$* ) function have yet been reported.

Here we investigated the cellular requirement for *LM $\alpha 5$*  expression in the mouse placental labyrinth using conditional and constitutive *LM $\alpha 5$*  mutant alleles, as well as Cre, Cre-activated reverse tetracycline transactivator (rtTA), and h*LM $\alpha 5$*  transgenes. Our results suggest that both trophoblasts and endothelial cells normally contribute *LM $\alpha 5$* -containing trimers to the endothelial

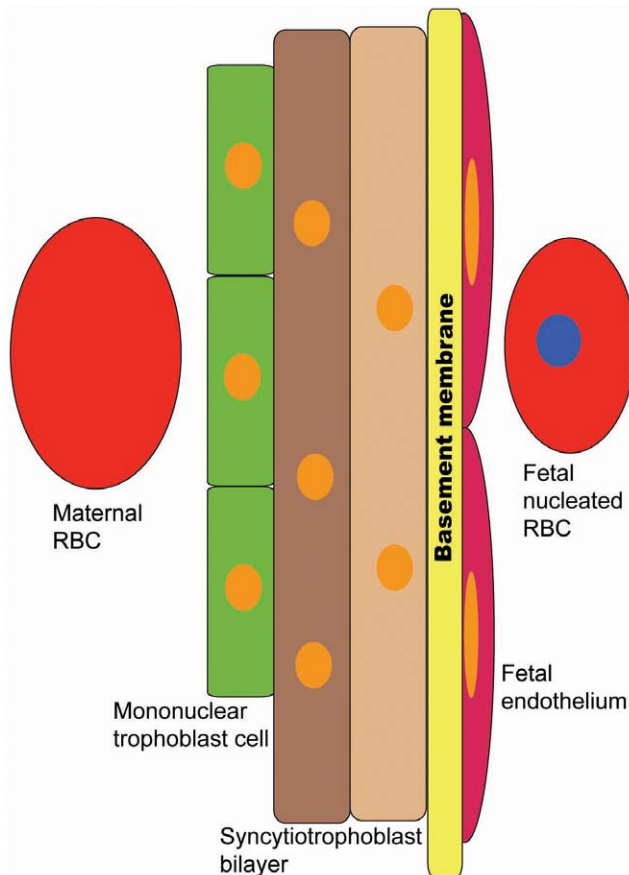

**Figure 1. Schematic diagram of the barrier between the maternal and embryonic vasculatures within the placental labyrinth.** The placental endothelial basement membrane, which normally contains *LM $\alpha 5$* , lies between the fetal endothelium and the trilaminar trophoblast cellular structure. Mononuclear trophoblasts line the maternal blood spaces, whereas the other two trophoblast layers are syncytial due to cell-cell fusion. Maternal red blood cells (RBCs) lack nuclei, whereas fetal RBCs retain nuclei until late gestation. doi:10.1371/journal.pone.0041348.g001

BM, and that expression by either cell is sufficient for normal placentation. In addition, we confirmed previous tissue grafting studies [18] showing that endothelial *LM $\alpha 5$*  expression is sufficient for vascularization of kidney glomeruli.

## Results

### Expression of Laminin Chains in the Placenta

Although some classes of endothelial cells have been shown to express *LM $\alpha 5$* , not all do so [19]. To directly investigate whether labyrinth-derived endothelial cells and/or trophoblasts normally express *LM $\alpha 5$*  and other laminin chains found in the placenta [20], we used fluorescence activated cell sorting (FACS) to isolate endothelial (CD31-positive) and non-endothelial (CD31-negative) cell populations from the normal placental labyrinth (schematized in Fig. 1) after its dissociation into single cells (Fig. 2A). RNAs were prepared from these isolated cells and subjected to quantitative real-time RT-PCR for laminin  $\alpha 5$ ,  $\alpha 1$ ,  $\beta 1$ ,  $\beta 2$ , and GAPDH expression (Fig. 2B,C). The results showed that both populations of cells express each of these laminin chains, but that trophoblasts (CD31-negative cells) express more laminin  $\alpha 1$  and  $\beta 1$  than  $\alpha 5$  and  $\beta 2$ , whereas endothelial (CD31-positive) cells express more laminin  $\alpha 5$  and  $\beta 1$  than  $\alpha 1$  and  $\beta 2$ . The fact that *LM $\beta 2$* <sup>-/-</sup> embryos have normal placental labyrinths and are indistinguishable from control littermates at birth (JHM, unpublished studies and [21]) suggests that the  $\beta 1$ -containing trimers are sufficient for promoting normal placentation. Although these studies did not address the origin of laminin  $\alpha 2$  and  $\alpha 4$  in the labyrinth [20], no placental defects have been reported in the respective knockout mice [22–24].

### Consequences of Cell Type-Restricted Expression of *LM $\alpha 5$* in the Labyrinth

To determine the cellular requirements for *LM $\alpha 5$*  expression in the mouse placental labyrinth, we used Cre/LoxP and doxycycline-inducible systems to generate mosaic placentas in which either the trophoblasts or the endothelial cells, but not both, were capable of expressing *LM $\alpha 5$* . We used two distinct approaches. First, to generate placentas with normal trophoblasts and *LM $\alpha 5$*  null endothelial cells, we took advantage of the selective expression pattern of the Sox2Cre transgene [25]. When this gene is transmitted by the sire, it is expressed in the epiblast (Fig. 3A), which gives rise to the embryo proper and to the allantois, from which originate the extraembryonic endothelial cells of the labyrinth [26]; however, Sox2Cre is not expressed in the trophoctoderm (Fig. 3B), which gives rise to the trophoblasts.

We mated *LM $\alpha 5$* <sup>+/-</sup>;Sox2Cre males with *LM $\alpha 5$* <sup>fl</sup> females to generate *LM $\alpha 5$* <sup>fl/-</sup>;Sox2Cre (mutant) embryos and littermate controls. At E14.5, mutant embryos (at least five from different litters were examined in detail) showed the typical *LM $\alpha 5$*  null embryonic phenotype—partially penetrant exencephaly and syndactyly (Fig. 3E'; compare to E) associated with a lack of *LM $\alpha 5$*  (Fig. 3C',D'; compare to C,D), although BMs were generally positive when immuno-stained for nidogen (Fig. 3D'). In contrast, we detected abundant *LM $\alpha 5$*  protein in placental labyrinth BMs, and the overall architecture of the labyrinth was similar to that of control littermates (Fig. 3F–H, F'–H'); there was an extensive network of PECAM-positive small caliber vessels, and most maternal blood spaces, which are lined by cytokeratin 8-positive trophoblasts, were juxtaposed to embryonic vessels with BMs that stained for LM-111. These results suggest that laminin trimers containing  $\alpha 5$  that are synthesized and secreted by trophoblasts are capable of integrating into the BM and promoting

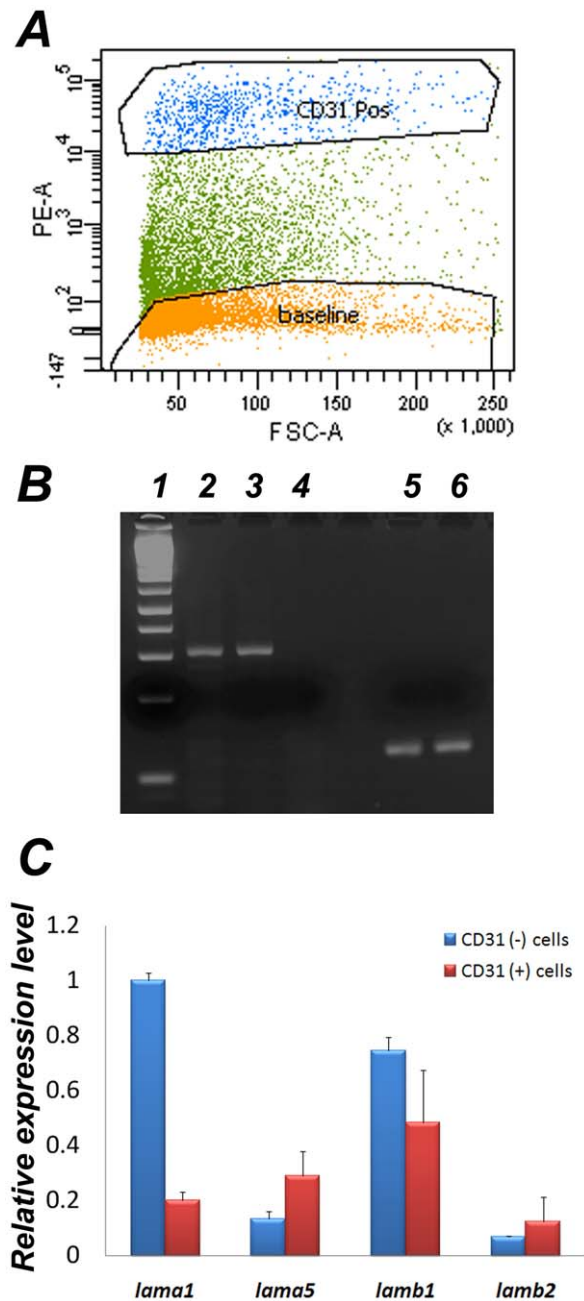

**Figure 2. LM $\alpha 5$  is expressed in both endothelial cells and trophoblasts in the normal placenta.** (A) Fluorescence-activated cell sorting was performed on dissociated E18.5 wild-type labyrinth cells after staining with a phycoerythrin (PE)-conjugated CD31/PECAM antibody. CD31+ (endothelial cell) and CD31- (trophoblast; indicated as baseline) populations were collected. (B) RT-PCR using RNA prepared from the two cell types showed that LM $\alpha 5$  was expressed in both: Lane 1, DNA marker; 2 and 3, LM $\alpha 5$  in CD31(-) and (+) cells, respectively; 4, negative control; 5 and 6, GAPDH in CD31(-) and (+) cells, respectively. (C) RNA was subjected to real time RT-PCR to quantitate the levels of laminin  $\alpha 1$  (*lama1*),  $\alpha 5$  (*lama5*),  $\beta 1$  (*lamb1*), and  $\beta 2$  (*lamb2*) mRNAs. Error bars represent standard deviations. doi:10.1371/journal.pone.0041348.g002

normal vascularization of the placenta, but they are not sufficient to rescue LM $\alpha 5$ -/- phenotypes within the embryo.

In the second approach, we utilized a combination of transgenes and mutations to perform the converse experiment. We used the

endothelial cell-specific Tie2Cre transgene to activate expression of the reverse tetracycline transactivator (rtTA), which had been knocked into the *Rosa26* locus preceded by a floxed STOP (genotype *RO26TA*). In the presence of doxycycline, this rtTA drives expression of the TetO<sub>7</sub>-regulated hLM $\alpha 5$  transgene (Fig. 4A). When these three loci are present in genetically LM $\alpha 5$ -/- embryos exposed to doxycycline, all endothelial cells should express hLM $\alpha 5$ , and there is no other source of  $\alpha 5$  (either mouse or human).

Seven embryos of the appropriate genotypes from four litters, along with LM $\alpha 5$ -/- and normal control embryos, were identified by PCR and studied. At E14.5, LM $\alpha 5$ -/-;RO26TA;hLM $\alpha 5$ ;TIE2Cre embryos showed the typical LM $\alpha 5$  null phenotype (Fig. 4D; compare to D') and lacked mouse LM $\alpha 5$  (Fig. 4B,E; compare to B',E'). As expected from the approach, hLM $\alpha 5$  was detected in embryonic endothelial BMs (Fig. 4C; compare to C'). Human LM $\alpha 5$  was also present in placental labyrinth BMs (Fig. 4F; compare to F'), and this resulted in apparently normal placentation, as determined from the pattern of LM-111 staining (Fig. 4G and Fig. 5C,C',F,F'), which was similar to the control (Fig. 5A,A',D,D'). However, this was in stark contrast to the LM-111 staining pattern in the LM $\alpha 5$  null placenta that did not express hLM $\alpha 5$  (Fig. 4G' and Fig. 5B,B',E,E'). The apparently normal placental labyrinth of transgenic LM $\alpha 5$ -/- embryos was associated with a larger but not quite normal embryo size at E18.5 (Fig. 6); this could be due to rescue of placental insufficiency, but might also stem from an overall healthier vasculature within the embryo itself. Nevertheless, with the exceptions noted below, the typical developmental defects of LM $\alpha 5$ -/- embryos were still present, including syndactyly, partially penetrant exencephaly (Figs. 4D, 6), and an absent pleural basement membrane in the lung (not shown). Together, these results suggest that endothelium-derived LM $\alpha 5$  can support normal placentation. And combined with the RT-PCR data (Fig. 2), results from the mosaic labyrinth studies suggest that trophoblasts make LM-111 and LM-511, whereas endothelial cells make primarily LM-511 and LM-521.

### Consequences of Endothelium-Specific Expression of LM $\alpha 5$ in the Kidney Glomerulus

We have previously shown that vascularization of the kidney glomerulus is defective in LM $\alpha 5$  null embryos due to breakdown of the GBM, disorganization of podocytes, and failure of endothelial and mesangial cells to establish glomerular capillaries [6]. However, when embryonic LM $\alpha 5$ -/- kidneys are grafted into newborn WT kidneys, invading WT endothelial cells can supply LM $\alpha 5$ -containing trimers and rescue glomerular vascularization [18]. Here we studied glomerulogenesis at E14.5 (not shown) and E18.5 in several LM $\alpha 5$  null embryos with endothelial cell-specific expression of hLM $\alpha 5$  (Fig. 7A'-C') as compared to controls with hLM $\alpha 5$  expression (Fig. 7A-C) and LM $\alpha 5$ -/- embryos without transgene expression (Fig. 7A''-C''). Similar to the grafted LM $\alpha 5$  null kidneys infiltrated by wild-type endothelial cells [18], it appears that glomerular endothelial cell expression of hLM $\alpha 5$  (Fig. 7A') was sufficient to rescue glomerulogenesis, based upon the proper localization of PECAM-positive endothelial cells adjacent to WT1-positive podocytes in the control and "rescued" glomeruli (Fig. 7C,C'); this clearly contrasts with the LM $\alpha 5$ -/- kidney's avascular "glomeruli" (Fig. 7C''). Rescue of glomerulogenesis was associated with deposition (albeit weak) of hLM $\alpha 5$  in the GBM (Fig. 7A,A'). Finally, transmission electron microscopic analysis of the glomerular capillary wall revealed that endothelial cell-derived hLM $\alpha 5$  promoted maintenance of GBM architecture, successful glomerular vascularization, and even podocyte foot process formation, all of which were comparable to the control



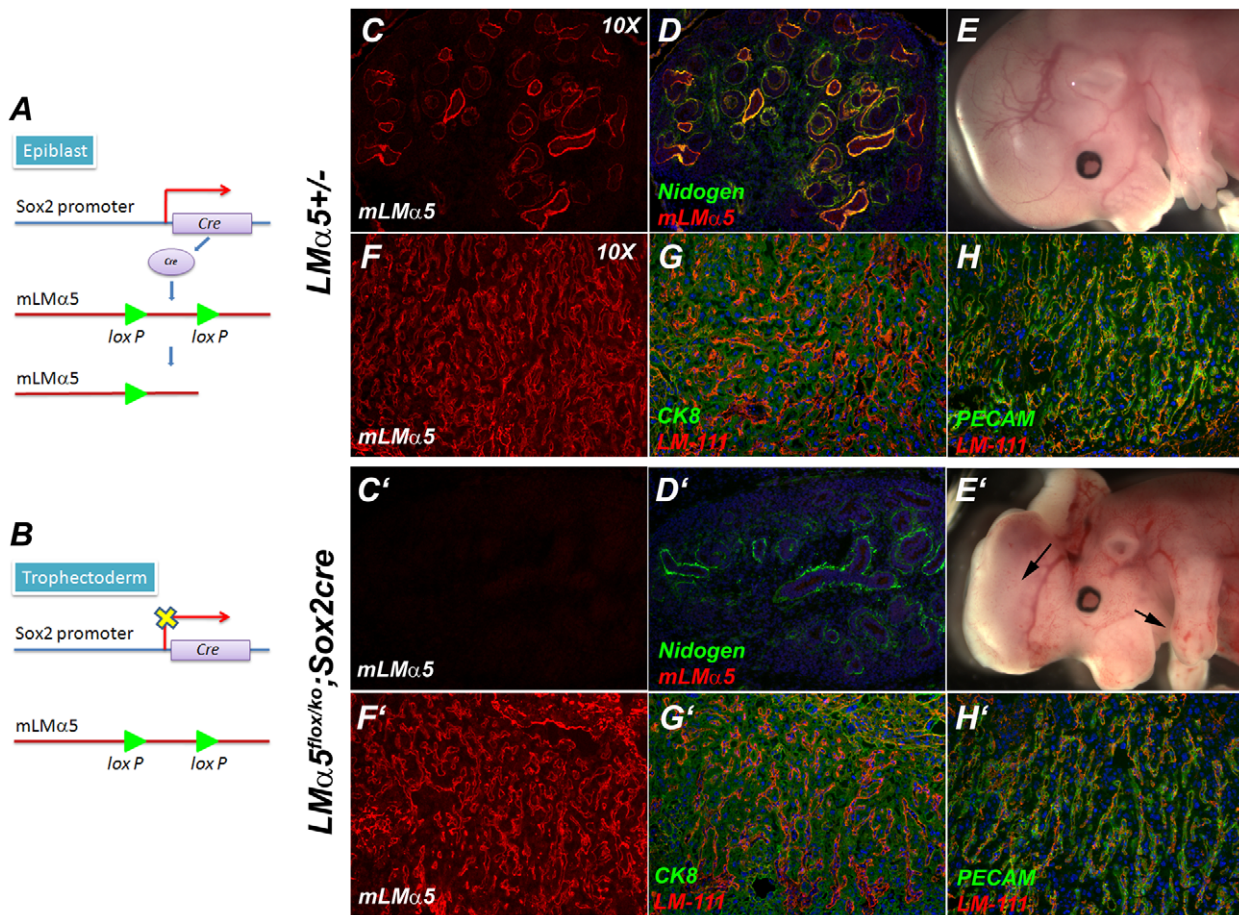

**Figure 3. Mosaic placental labyrinths containing wild-type trophoblasts and  $LM\alpha 5^{-/-}$  endothelial cells show  $LM\alpha 5$  deposition and normal vascularization.** (A, B) Schematic diagrams of the strategy for conditional mouse  $LM\alpha 5$  mutation. Using the Cre/loxP system, we generated  $LM\alpha 5^{flox/ko}; Sox2cre$  embryos.  $Sox2cre$ , when inherited from a male, is active in epiblast, but not in trophectoderm. Thus, epiblast-derived cells (A), which include the embryo proper as well as extraembryonic endothelial cells, are not able to synthesize  $LM\alpha 5$ , but trophoblasts, which derive from trophectoderm (B), can. (C–H; C'–H') Analysis of  $LM\alpha 5$  expression and tissue architecture in control (top rows) and  $LM\alpha 5^{flox/ko}; Sox2cre$  mutant (bottom rows) embryos.  $LM\alpha 5$  was not expressed in the kidney of  $LM\alpha 5^{flox/ko}; Sox2cre$  embryos (C'); counterstained with anti-nidogen in D'; compare with control, C and D), which show developmental abnormalities typical of  $LM\alpha 5^{-/-}$  embryos (E'; arrows indicate exencephaly and syndactyly) not seen in control (E). In contrast,  $LM\alpha 5$  was present in the placental labyrinth of  $LM\alpha 5^{flox/ko}; Sox2cre$  embryos (F') and of control (F), and placental LM-111 and PECAM expression and localization were similar to those observed in control  $LM\alpha 5^{+/-}$  placenta (G–H, G'–H'). Cytokeratin 8 (CK8) was used to identify trophoblasts (G, G').  
doi:10.1371/journal.pone.0041348.g003

(Fig. 7D,E). These results lend support to our previous conclusions regarding the ability of endothelial-cell derived  $LM\alpha 5$  to promote glomerulogenesis when podocytes are unable to express it [18], although the glomerular filter eventually becomes leaky to plasma albumin in the absence of podocyte  $LM\alpha 5$  expression [27].

## Discussion

The murine placental labyrinth is a highly vascularized organ tailored for the transfer and transport of nutrients, wastes, and gases between mother and embryo [15]. In humans, placental insufficiency and the resulting intrauterine growth restriction are important health problems that can develop due to defects in the structure or function of the placental vasculature [28]. Although the placentas of mice and humans exhibit many differences [29], one similarity is that both the mouse labyrinth and the human chorionic villi, the major sites of materno-fetal exchange, are enriched in BMs, due in part to the density of fetal blood vessels.

We previously showed that mice lacking  $LM\alpha 5$  exhibit dramatically impaired vascularization of the placental labyrinth [5]; there are many maternal blood spaces but fewer fetal blood vessels juxtaposed to them than in controls (ref. [20] and Figs. 3 and 5). Thus, there is no apparent defect in the ability of  $LM\alpha 5^{-/-}$  trophoblasts to invade the deciduum and form maternal blood spaces through branching morphogenesis. However, we cannot rule out a contribution of maternal/decidual  $LM\alpha 5$  to promoting this invasion.

The placental vasculature is attenuated in the absence of  $LM\alpha 5$ , despite the fact that the laminin  $\alpha 1$ ,  $\alpha 2$ , and  $\alpha 4$  chains are all present in the BM [20]. In contrast, global mutation of  $LM\alpha 2$  and  $LM\alpha 4$  has not been reported to cause placental defects [22,23], suggesting that  $LM\alpha 5$  has a non-redundant role in placentation. Moreover, structure-function analysis of the  $LM\alpha 5$  COOH-terminal LG domain, which has five segments, revealed that the LG1–2 segment is required for promoting normal placental vascularization, and that the analogous LG1–2 segments of  $LM\alpha 1$  could not compensate [20]. Interestingly, one of the first mono-

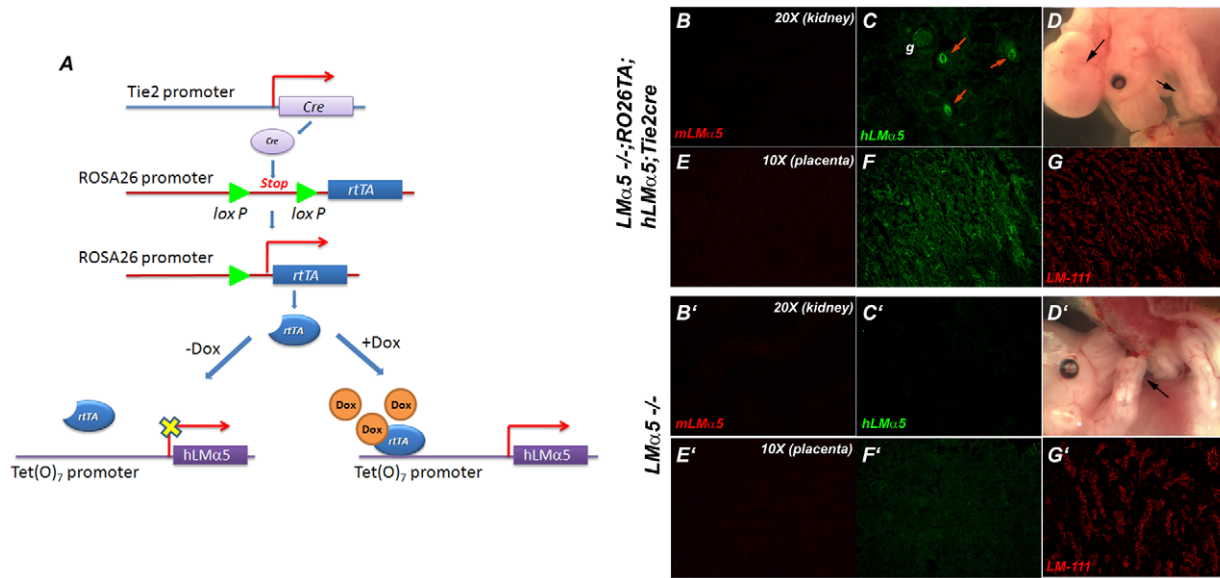

**Figure 4. Mosaic placental labyrinths containing  $LM\alpha 5^{-/-}$  trophoblasts and hLM $\alpha 5$ -expressing endothelial cells show hLM $\alpha 5$  deposition and normal vascularization.** (A) Schematic diagram of the strategy for forcing expression of hLM $\alpha 5$  in endothelial cells on the  $LM\alpha 5^{-/-}$  background. Cre recombinase driven by the Tie2 promoter removes a floxed STOP located between the *Rosa26* promoter and the reverse tetracycline transactivator (rtTA). rtTA binds and activates the tetracycline-inducible TetO<sub>7</sub> promoter in the presence of doxycycline, thereby driving transcription of the hLM $\alpha 5$  cDNA in endothelial cells. (B–G)  $LM\alpha 5^{-/-};ROSA26TA;hLM\alpha 5;Tie2cre$  embryos (top panels) were compared with  $LM\alpha 5^{-/-}$  embryos (bottom panels). Mouse LM $\alpha 5$  was undetectable in kidney (B, B') or placenta (E, E'). Human LM $\alpha 5$  was detected in both kidney and placental vasculatures of  $LM\alpha 5^{-/-};ROSA26TA;hLM\alpha 5;Tie2cre$  embryos (C, F) but not of  $LM\alpha 5^{-/-}$  embryos (C', F'), both of which show the typical LM $\alpha 5$  null phenotype (D, D'). Expression of hLM $\alpha 5$  in endothelial cells was associated with a normalized placental labyrinth architecture, demonstrated by the LM-111 antibody staining pattern (compare G and G'). doi:10.1371/journal.pone.0041348.g004

clonal antibodies known to be made to hLM $\alpha 5$ , clone 4C7, was generated by immunizing mice with laminins purified from human placenta [30]. Directed efforts aimed at defining the laminin composition of human placental villous BMs revealed that as in mouse, laminin  $\alpha 1$ ,  $\alpha 2$ , and  $\alpha 5$  are present; LM $\alpha 4$  was not

investigated [31]. The possibility therefore exists that, as in mouse, LM $\alpha 5$  plays a critical role in vascularization of the human placenta.

Here we focused on investigating the cellular requirements for LM $\alpha 5$  expression in the mouse labyrinth using mutant  $LM\alpha 5$

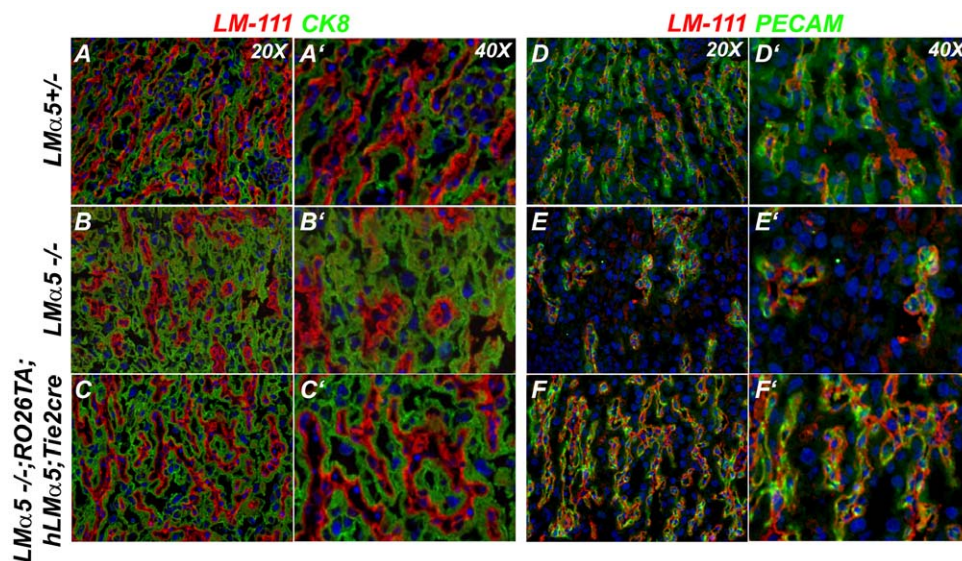

**Figure 5. Analysis of placental labyrinth vasculature at E14.5.** Frozen sections of placenta were stained with antibodies to LM-111 to label all basement membranes, to cytokeratin 8 (CK8) to label trophoblasts (green in A–C, A'–C'), and to PECAM to label endothelial cells (green in D–F, D'–F'). The reduced vascular complexity in the  $LM\alpha 5^{-/-}$  labyrinth (B, E) was rescued and made similar to normal (A, D) by hLM $\alpha 5$  secretion from  $LM\alpha 5^{-/-};ROSA26TA;hLM\alpha 5;Tie2cre$  endothelial cells (C, F) exposed to doxycycline. doi:10.1371/journal.pone.0041348.g005



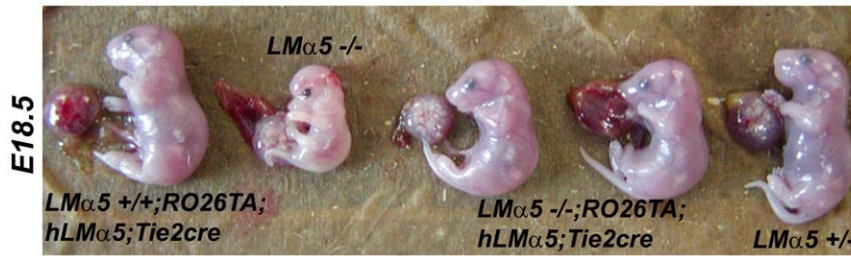

**Figure 6. Phenotype of various  $LM\alpha 5$  mutant and control embryos at E18.5.** Genotypes are indicated. The mother was fed doxycycline beginning at E0.5. Endothelial expression of hLM $\alpha 5$  in  $LM\alpha 5^{-/-};RO26TA;hLM\alpha 5;Tie2cre$  embryos resulted in a larger (though still not quite normal) embryo size compared to the nontransgenic  $LM\alpha 5^{-/-}$  embryo. doi:10.1371/journal.pone.0041348.g006

alleles and various transgenes to generate mosaic placentas. Moreover, the strategy we used also facilitated studies of mosaic kidney glomeruli. In placenta we found that expression of LM $\alpha 5$

either in trophoblast or in endothelium was sufficient for apparently normal vascularization, despite the fact that  $\alpha 5$  is normally expressed in both cell types. Similar studies in kidney

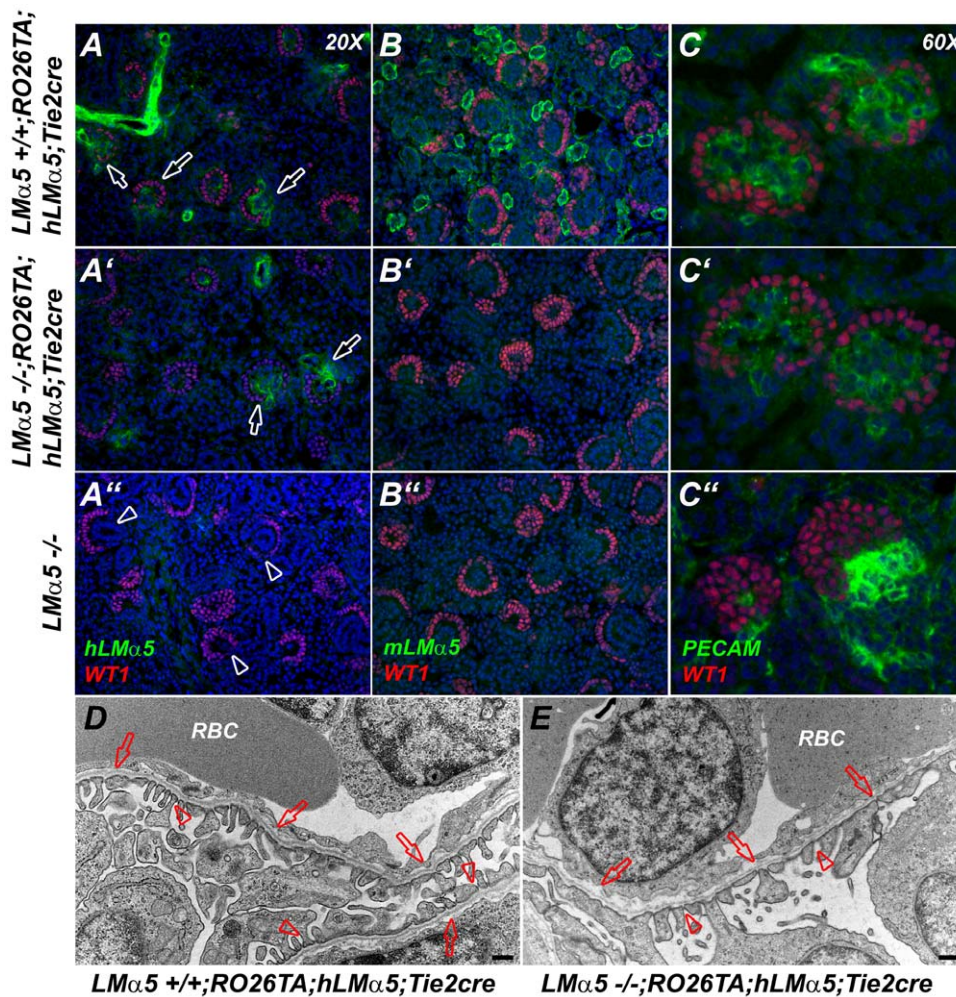

**Figure 7. Expression of hLM $\alpha 5$  in glomerular endothelial cells rescues glomerular vascularization in  $LM\alpha 5^{-/-}$  kidney.** (A,B) Analysis of human (A) and mouse (B) LM $\alpha 5$  expression (green) relative to WT1 (red), which stains podocyte nuclei at E18.5. Human LM $\alpha 5$  is visible primarily in the glomeruli (open arrows) and in arterioles in embryos carrying the transgenes (A,A') but is absent from the mutant lacking the transgenes (A''); open arrowheads indicate glomeruli). (C) Status of glomerular vascularization was revealed by PECAM (green) and WT1 (red) double staining. PECAM-positive endothelial cells were properly localized inside glomeruli when either mouse or hLM $\alpha 5$  or both were present in the GBM (C, C'), but glomerulogenesis failed in the absence of LM $\alpha 5$  (C''). (D,E) Transmission electron microscopic analysis of glomeruli in control (D) and rescued mutant (E) kidney reveals that both have an intact GBM (arrows), capillaries containing red blood cells (RBCs), and podocytes with foot processes (arrowheads). Bars in D and E are 500 nm. doi:10.1371/journal.pone.0041348.g007

glomeruli showed that expression of LM $\alpha 5$  solely in endothelial cells was sufficient to rescue glomerulogenesis in LM $\alpha 5^{-/-}$  embryos, as predicted from our previous grafting studies [18]. Thus, endothelial LM $\alpha 5$  expression is sufficient for function of two different vascular BMs that are normally co-synthesized by a flanking cell of a different type—trophoblasts in the labyrinth (Figs. 2 and 3) and podocytes in the glomerulus [14,27]. In contrast, other defects that we have previously studied in detail in *Lama5^{-/-}* embryos, including defects in neural tube closure, digit septation, and lung lobe septation, were not ameliorated by forced endothelial cell-specific expression of LM $\alpha 5$ . This was expected, as the presumed mechanisms leading to these defects do not involve endothelial basement membranes [5,7].

What is the function of LM $\alpha 5$  in the placental labyrinth? Histopathology suggests there is a defect both in branching morphogenesis/angiogenesis of fetal vessels and in adhesion of fetal endothelial cells to the BM when LM $\alpha 5$  is absent [5]. These defects may be mechanistically related; the impaired adhesion suggests that endothelial cell migration should be inhibited due to reduced affinity for the BM, which endothelial cells likely use as a pathway for migration during angiogenesis. Endothelial cells originating from the allantois may bear a receptor with high affinity for LM $\alpha 5$ , or LM $\alpha 5$  may bind and concentrate within the BM an adhesive or trophic factor required for promoting efficient angiogenesis. In any event, inefficient angiogenesis during the critical period of placentation leads to the observed defects and likely results in placental insufficiency. Further investigation into the mechanisms involved could lead to a better understanding of human placentation and of the regulation of angiogenesis in diverse tissues.

One important outcome of these studies with implications beyond the placenta and kidney is that the rescue of a deficiency in a BM need not always target all the cells that normally contribute to its synthesis. Given the accessibility of endothelial cells to potential nucleic acid, viral, or cell-based therapies via the bloodstream, they may be especially amenable to treatments that can influence the composition of vascular BMs throughout the body, whether in normal, diseased, or in cancerous tissue. And finally, our results represent another example of the cross-species compatibility of BM protein orthologs, suggesting that non-human BM proteins would likely be functional in the context of human tissues. This notion is also supported by a recent study of mice expressing human LM $\alpha 5$  from a BAC transgene [32].

## Materials and Methods

### Ethics Statement

All animal studies were approved by the Washington University Animal Studies Committee and performed in accordance with the NIH Guide for the Care and Use of Laboratory Animals.

### Genetically altered mice and administration of doxycycline

Mice carrying LM $\alpha 5^{-}$  and LM $\alpha 5^{fl}$  alleles and the tetO<sub>7</sub>-regulated hLM $\alpha 5$  cDNA have been previously described [5,12,27]. Purchased from The Jackson Laboratory were mice carrying the Sox2Cre transgene (stock #008454), expressed in epiblast when transmitted by sperm [25]; mice carrying the Tie2Cre transgene (stock #004128), expressed in endothelial cells [33]; and mice carrying the reverse tetracycline transactivator following a loxP-flanked neo/transcription termination signal inserted into the widely active *Rosa26* locus (stock #005572) [34]. When required to induce hLM $\alpha 5$  expression in endothelial cells, pregnant females were fed doxycycline-containing chow

(0.15%; El Mel, Inc., St. Charles, MO) beginning on the day that a vaginal plug was observed (embryonic day 0.5) and continuing until the time of sacrifice.

### Antibodies

The antibodies or reagents that were used were as follows: rabbit anti-mouse LM $\alpha 5$  [35], mouse anti-hLM $\alpha 5$ , clone 4C7 [30], rat anti-PECAM/CD31 (MEC 13.3; BD Pharmingen), rat anti-cytokeratin 8 (TROMA-1, Developmental Studies Hybridoma Bank, Iowa City, IA), rat anti-nidogen (clone ELM1; Millipore), rabbit anti-mouse laminin  $\alpha 1\beta 1\gamma 1$  (LM-111) and Hoechst 33342 (Sigma, St. Louis, MO), rabbit anti-Wilms Tumor-1 (H-290; Santa Cruz Biotechnology, Santa Cruz, CA), and FITC- and Cy3-conjugated secondary antibodies (Molecular Probes, Eugene, OR).

### Immunofluorescence and electron microscopy

Frozen sections (8  $\mu$ m) were fixed in 4% paraformaldehyde in PBS for 10 min and washed three times with PBS. After blocking with 5% normal goat serum in 1% BSA-PBS for 1 hr, the sections were incubated with the primary antibody overnight at 4°C, washed three times for 10 min with PBS, and incubated with secondary antibody for 30 min. Images were viewed with a Nikon Eclipse E800 microscope (Nikon Instruments Corp., Melville, NY USA) and captured with an Olympus DP2 digital camera using Olympus DP2-BSW software. Transmission electron microscopy was performed as described [36].

### Isolation of placental endothelial cells

Placentas from normal embryos were cleaned in Hank's balanced salt solution (HBSS, Sigma), cut into 1–3 mm pieces, and placed in 1 mg/ml collagenase at 37°C for 60 min with gentle pipetting every 15 min. Cell suspensions were filtered through a 70  $\mu$ m cell strainer (BD Bioscience) and washed. After lysing red blood cells, isolated cells were incubated with phycoerythrin-conjugated PECAM/CD31 antibody (BD Pharmingen) for 30 min on ice. Prior to sorting, cells were washed, filtered through a 70  $\mu$ m cell strainer, and resuspended with 1 mM EDTA/0.5% BSA/PBS. CD31-positive cells from placenta were sorted using a BD Aria II High Speed Cell Sorter, gated for high-level CD31 expression.

### RNA extraction and quantitative real-time PCR

Total RNA was isolated using RNeasy Mini or Micro Kit (Qiagen, Chatsworth, CA USA). Reverse transcription with oligo (dT) priming was performed using Superscript III (Invitrogen, Carlsbad, CA USA). The relative expression of each transcript was determined by quantitative real-time PCR in the fast mode (annealing and extending at 60°C) with a 7900 HT Fast Real-Time PCR System (Applied Biosystems, Forrest City, CA USA). Each well of the 96-well reaction plate contained a total volume of 20  $\mu$ L with Fast Power SYBR Green PCR Master Mix (Applied Biosystems). The abundance of mRNA transcript was measured and normalized to glyceraldehyde 3-phosphate dehydrogenase (Gapdh). The primer sequences were: for LM $\alpha 1$ , forward: 5'-CCAGTGACAAGGAGACAAAGC-3', reverse: 5'-CACTCCGTAGGAATTTCTCAGC-3'; for LM $\alpha 5$ , forward: 5'-TTGGTGGTGTGGAGCGGGC-3', reverse: 5'-ACTAGGAAGTGCCAGGGGCAG-3'; for LM $\beta 1$ , forward: 5'-CGTGACCATCCAACCTGGACCTGG-3', reverse: 5'-CACGCCCCAAGCCTTCCCAA-3'; for LM $\beta 2$ , forward: 5'-GACCTGTGCCATTGTGACCC-3', reverse: 5'-GAGCTCTTGGCACTCAGAAC-3'; and for Gapdh, forward:

5'-AGGTCGGTGTGAACGGATTTG-3', reverse: 5'-TGTA-GACCATGTAGTTGAGGTCA-3'.

### Statistical analysis

Two-tailed, unpaired Student's *t*-tests were used to determine statistical difference. Differences were considered significant when the *P* value was <0.05.

### References

- Patton BL, Miner JH, Chiu AY, Sanes JR (1997) Distribution and function of laminins in the neuromuscular system of developing, adult, and mutant mice. *J Cell Biol* 139: 1507–1521.
- Noakes PG, Gautam M, Mudd J, Sanes JR, Merlie JP (1995) Aberrant differentiation of neuromuscular junctions in mice lacking  $\alpha$ -laminin/laminin beta2. *Nature* 374: 258–262.
- Miner JH, Yurchenco PD (2004) Laminin functions in tissue morphogenesis. *Annu Rev Cell Dev Biol* 20: 255–284.
- Miner JH, Lewis RM, Sanes JR (1995) Molecular cloning of a novel laminin chain,  $\alpha 5$ , and widespread expression in adult mouse tissues. *J Biol Chem* 270: 28523–28526.
- Miner JH, Cunningham J, Sanes JR (1998) Roles for laminin in embryogenesis: Exencephaly, syndactyly, and placentopathy in mice lacking the laminin  $\alpha 5$  chain. *J Cell Biol* 143: 1713–1723.
- Miner JH, Li C (2000) Defective glomerulogenesis in the absence of laminin  $\alpha 5$  demonstrates a developmental role for the kidney glomerular basement membrane. *Dev Biol* 217: 278–289.
- Nguyen NM, Miner JH, Pierce RA, Senior RM (2002) Laminin alpha 5 is required for lobar septation and visceral pleural basement membrane formation in the developing mouse lung. *Dev Biol* 246: 231–244.
- Fukumoto S, Miner JH, Ida H, Fukumoto E, Yuasa K, et al. (2006) Laminin alpha5 is required for dental epithelium growth and polarity and the development of tooth bud and shape. *J Biol Chem* 281: 5008–5016.
- Coles EG, Gammill LS, Miner JH, Bronner-Fraser M (2006) Abnormalities in neural crest cell migration in laminin alpha5 mutant mice. *Dev Biol* 289: 218–228.
- Gao J, Derouen MC, Chen CH, Nguyen M, Nguyen NT, et al. (2008) Laminin-511 is an epithelial message promoting dermal papilla development and function during early hair morphogenesis. *Genes Dev* 22: 2111–2124.
- Mahoney ZX, Stappenbeck TS, Miner JH (2008) Laminin {alpha}5 influences the architecture of the mouse small intestine mucosa. *J Cell Sci* 121: 2493–2502.
- Nguyen NM, Kelley DG, Schlueter JA, Meyer MJ, Senior RM, et al. (2005) Epithelial laminin alpha5 is necessary for distal epithelial cell maturation, VEGF production, and alveolization in the developing murine lung. *Dev Biol* 282: 111–125.
- Rebutini IT, Patel VN, Stewart JS, Layvey A, Georges-Labouesse E, et al. (2007) Laminin alpha5 is necessary for submandibular gland epithelial morphogenesis and influences FGFR expression through beta1 integrin signaling. *Dev Biol* 308: 15–29.
- St. John PL, Abrahamson DR (2001) Glomerular endothelial cells and podocytes jointly synthesize laminin-1 and -11 chains. *Kidney Int* 60: 1037–1046.
- Watson ED, Cross JC (2005) Development of structures and transport functions in the mouse placenta. *Physiology (Bethesda)* 20: 180–193.
- Simmons DG, Natale DR, Begay V, Hughes M, Leutz A, et al. (2008) Early patterning of the chorion leads to the trilaminar trophoblast cell structure in the placental labyrinth. *Development* 135: 2083–2091.
- Tiger C-F, Champliand M-F, Pedrosa-Domellof F, Thornell L-E, Ekblom P, et al. (1997) Presence of laminin  $\alpha 5$  chain and lack of laminin  $\alpha 1$  chain during human muscle development and in muscular dystrophies. *J Biol Chem* 272: 28590–28595.
- Abrahamson DR, St John PL, Isom K, Robert B, Miner JH (2007) Partial rescue of glomerular laminin alpha5 mutations by wild-type endothelia produce hybrid glomeruli. *J Am Soc Nephrol* 18: 2285–2293.

### Acknowledgments

We thank Jeanette Cunningham for performing electron microscopy and Jennifer Richardson for genotyping the mice.

### Author Contributions

Conceived and designed the experiments: JHM. Performed the experiments: STK. Analyzed the data: STK JHM. Contributed reagents/materials/analysis tools: STK TLK RMS JHM. Wrote the paper: STK TLK RMS JHM.

- Hallmann R, Horn N, Selg M, Wendler O, Pausch F, et al. (2005) Expression and function of laminins in the embryonic and mature vasculature. *Physiol Rev* 85: 979–1000.
- Kikkawa Y, Miner JH (2006) Molecular dissection of laminin alpha 5 in vivo reveals separable domain-specific roles in embryonic development and kidney function. *Dev Biol* 296: 265–277.
- Miner JH, Go G, Cunningham J, Patton BL, Jarad G (2006) Transgenic isolation of skeletal muscle and kidney defects in laminin beta2 mutant mice: implications for Pierson syndrome. *Development* 133: 967–975.
- Miyagoe Y, Hanaoka K, Nonaka I, Hayasaka M, Nabeshima Y, et al. (1997) Laminin alpha2 chain-null mutant mice by targeted disruption of the Lama2 gene: a new model of merosin (laminin 2)-deficient congenital muscular dystrophy. *FEBS Lett* 415: 33–39.
- Thybol J, Kortessmaa J, Cao R, Soinen R, Wang L, et al. (2002) Deletion of the laminin alpha4 chain leads to impaired microvessel maturation. *Mol Cell Biol* 22: 1194–1202.
- Wang J, Hoshijima M, Lam J, Zhou Z, Jokiel A, et al. (2006) Cardiomyopathy associated with microcirculation dysfunction in laminin alpha4 chain-deficient mice. *J Biol Chem* 281: 213–220.
- Hayashi S, Lewis P, Pevny L, McMahon AP (2002) Efficient gene modulation in mouse epiblast using a Sox2Cre transgenic mouse strain. *Mech Dev* 119 Suppl 1: S97–S101.
- Shaut CA, Keene DR, Sorensen LK, Li DY, Stadler HS (2008) HOXA13 is essential for placental vascular patterning and labyrinth endothelial specification. *PLoS Genet* 4: e1000073.
- Goldberg S, Adair-Kirk TL, Senior RM, Miner JH (2010) Maintenance of glomerular filtration barrier integrity requires laminin alpha5. *J Am Soc Nephrol* 21: 579–586.
- Wulff C, Weigand M, Kreienberg R, Fraser HM (2003) Angiogenesis during primate placentation in health and disease. *Reproduction* 126: 569–577.
- Carter AM (2007) Animal models of human placentation—a review. *Placenta* 28 Suppl A: S41–47.
- Engvall E, Davis GE, Dickerson K, Ruoslahti E, Varon S, et al. (1986) Mapping of domains in human laminin using monoclonal antibodies: localization of the neurite-promoting site. *J Cell Biol* 103: 2457–2465.
- Korhonen M, Virtanen I (2001) Immunohistochemical localization of laminin and fibronectin isoforms in human placental villi. *J Histochem Cytochem* 49: 313–322.
- Steenhard BM, Zelenchuk A, Stroganova L, Isom K, St John PL, et al. (2011) Transgenic expression of human LAMA5 suppresses murine Lama5 mRNA and laminin alpha5 protein deposition. *PLoS One* 6: e23926.
- Koni PA, Joshi SK, Temann UA, Olson D, Burkly L, et al. (2001) Conditional vascular cell adhesion molecule 1 deletion in mice: impaired lymphocyte migration to bone marrow. *J Exp Med* 193: 741–754.
- Belteki G, Haigh J, Kabacs N, Haigh K, Sison K, et al. (2005) Conditional and inducible transgene expression in mice through the combinatorial use of Cre-mediated recombination and tetracycline induction. *Nucleic Acids Res* 33: e51.
- Miner JH, Patton BL, Lentz SI, Gilbert DJ, Snider WD, et al. (1997) The laminin alpha chains: expression, developmental transitions, and chromosomal locations of alpha1–5, identification of heterotrimeric laminins 8–11, and cloning of a novel alpha3 isoform. *J Cell Biol* 137: 685–701.
- Jarad G, Cunningham J, Shaw AS, Miner JH (2006) Proteinuria precedes podocyte abnormalities in Lamb2<sup>-/-</sup> mice, implicating the glomerular basement membrane as an albumin barrier. *J Clin Invest* 116: 2272–2279.
